# Supplementary material for: Long Non-Coding RNA Bmdsx-AS1 Effects on Male External Genital Development in Silkworm
Source: MDPI journal article supplement (doi:10.3390/insects13020188), 2022-02-11
Supplement: s1 [file s1]

Table S1 List of primer sequences used in this study.

| Primer name     | Primer sequence (5'to3')                         | Primer purpose         |
|-----------------|--------------------------------------------------|------------------------|
| AS1-F           | CACAGCGTTGGACGAAAGGAA                            | qPCR                   |
| AS1-R           | ACCGGACGAAGGTGGAGAAAT                            | qPCR                   |
| Promoter-AS1-F  | GGTACCAGATCTCTGAGGGTTCTGTCTGA                    | Construction of vector |
| Promoter-AS1-R  | AGATCTATACCCATGTTTCCTGTTCCGCA                    | Construction of vector |
| Bmdsx-AS1-F     | CGGGATCCGACACATTTTAGTGTCGGAGATAAAA               | Construction of vector |
| Bmdsx-AS1-R     | AAGGAAAAAAGCGGCCGCATTGTTTTGAATGCTGCATCTACAATGAT  | Construction of vector |
| Promoter--754-F | GGTACCAAGCTTAAGGTTACGTTTTATTAA                   | Construction of vector |
| Promoter--643-F | GGTACCCTGATTAAAGGATAATCTTCGGT                    | Construction of vector |
| Promoter--556-F | GGTACCCGAGTTCACATAACTCTCAGCCAG                   | Construction of vector |
| T7-Bmdsx-AS1-F  | GTAATACGACTCACTATAGGGGACACATTTTAGTGTCGGAGATAAAAA | RNAi                   |
| T7-Bmdsx-AS1-R  | GTAATACGACTCACTATAGGGCGACATCGCGAAACAAAGTCTTCAA   | RNAi                   |
| T7-EGFP-F       | AATACGACTCACTATAGGACGTAAACGGCCACAAGTTC           | RNAi                   |
| T7-EGFR-R       | AATACGACTCACTATAGGTGCTCAGGTAGTAGTGGTTGTCG        | RNAi                   |
| Abd-B-F         | CTATCCTCCAGATGCTCCCG                             | qPCR                   |
| Abd-B-R         | ACCCTGATGACAGCCTCCAT                             | qPCR                   |
| SPI-F           | ACTGTGAGTGTCAAAGCGGGTAT                          | qPCR                   |
| SPI-R           | GGACGCAGTCTCCATCATCAG                            | qPCR                   |
| Cbl-F           | CGAAAACGACAAGGACATCAG                            | qPCR                   |
| Cbl-R           | AATCAATTTGCCACGCAGTG                             | qPCR                   |
| Rho-F           | GAGATCGGAAGTATTATCAGGAGC                         | qPCR                   |
| Rho-R           | CCAACTCTAACAGTGTAACGCAGA                         | qPCR                   |
| Mop-F           | TTGGTGCCCTAAATACCGAACT                           | qPCR                   |
| Mop-R           | CTGGGCTTGACCTAAGCAAAT                            | qPCR                   |
| Hrs-F           | GACCGGAACTATTGGGAGCA                             | qPCR                   |

---

|       |                    |      |
|-------|--------------------|------|
| Hrs-R | GTGGAGGCAGTGAAGCAG | qPCR |
|-------|--------------------|------|

---
